# Supplementary material for: Residual temperature bias effects in stratospheric species distributions from LIMS
Source: Copernicus journal article supplement (doi:10.5194/amt-14-2185-2021), 2021-03-19
Supplement: Supplementary file 1 [file amt-14-2185-2021-supplement.pdf]

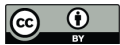

*Supplement of*

## **Residual temperature bias effects in stratospheric species distributions from LIMS**

**E. Remsberg et al.**

*Correspondence to:* Ellis Remsberg ([ellis.e.remsberg@nasa.gov](mailto:ellis.e.remsberg@nasa.gov))

The copyright of individual parts of the supplement might differ from the article licence.

1 **Supplemental materials**

2

3 Figures S1 to S3 show the LIMS monthly ascending (A) minus descending (D) plots of  
4 temperature (K) and ozone (%) for November, January, and May. They are analogous to Figures  
5 4 and 6 for March of the accompanying paper.

6

7 Figure S1—November

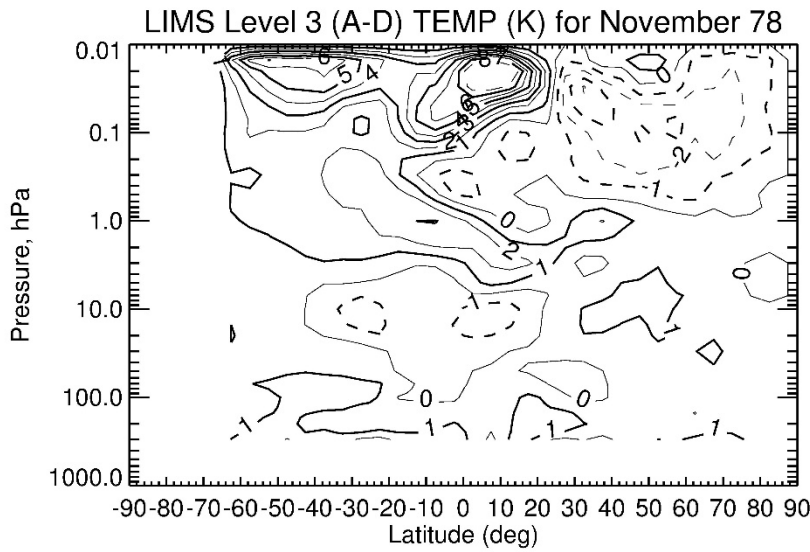

8

9

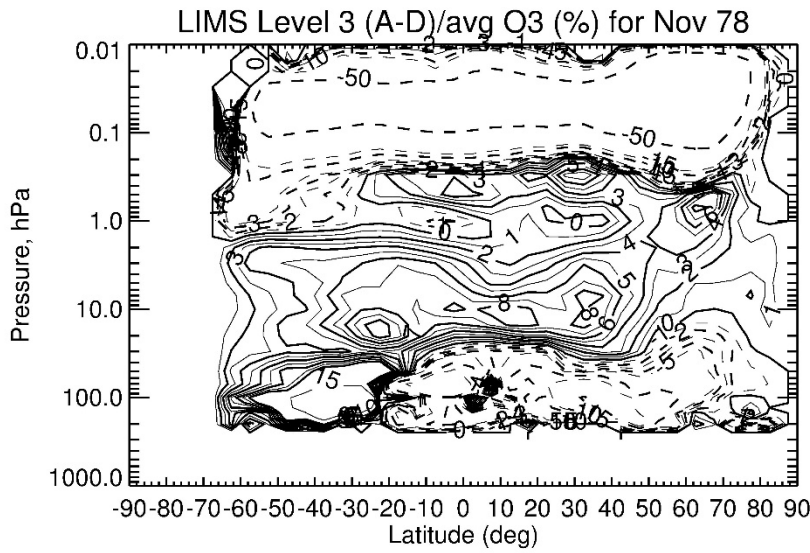

10

11

12

13 Figure S2—January

14

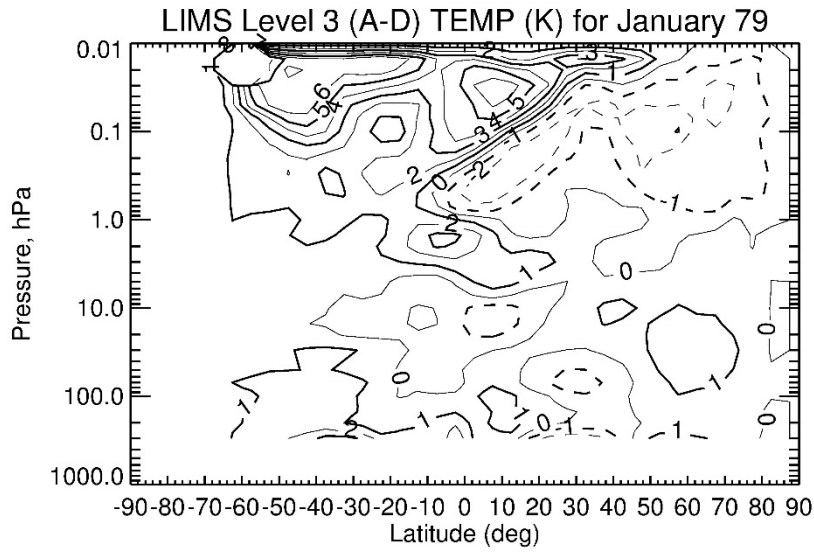

15

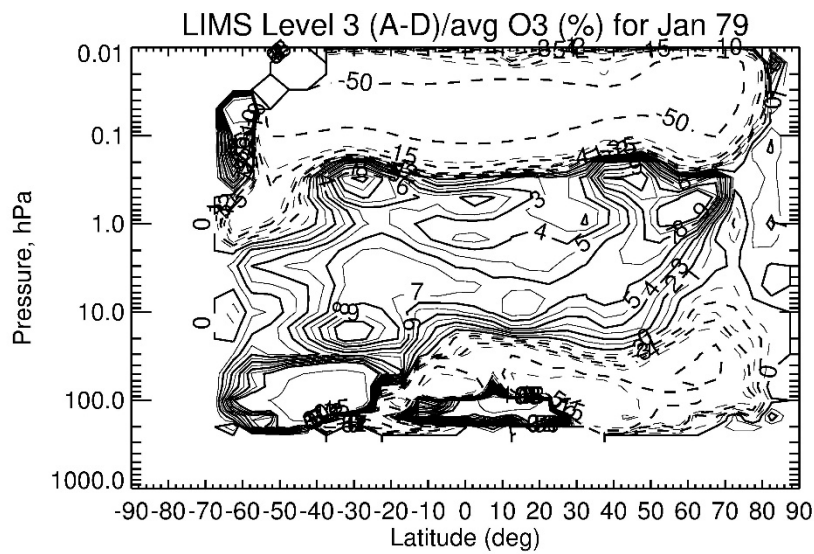

16

17

18

19 Figure S3—May

20

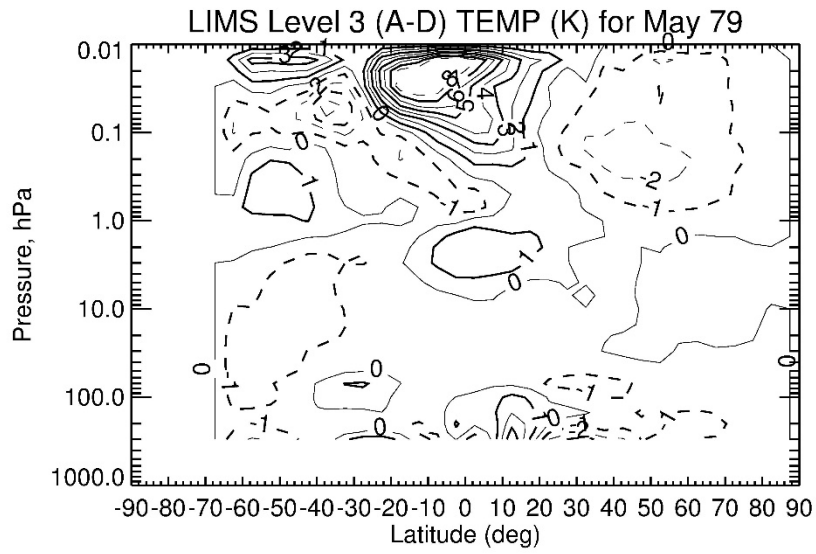

21

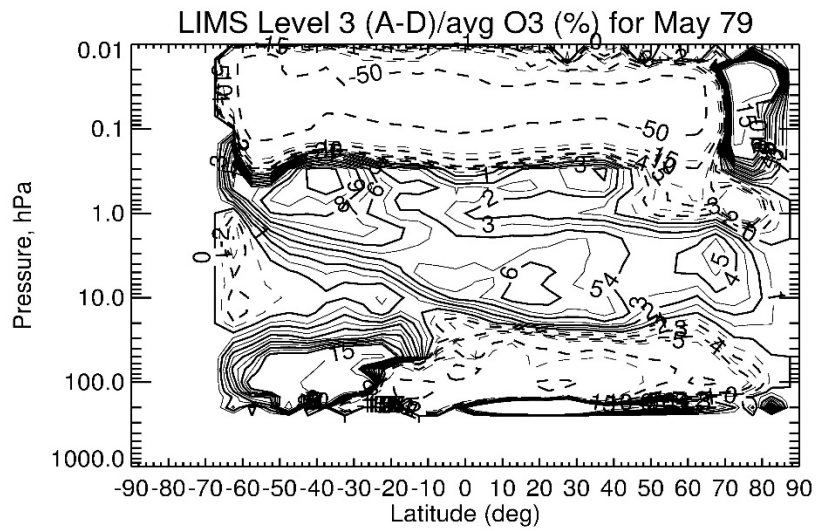

22

23
